# Supplementary material for: Allogeneic hematopoietic cell transplantation with non-myeloablative conditioning for patients with hematologic malignancies: improved outcomes over two decades
Source: PubMed Central journal article supplement — Haematologica. 2020 Jun 4;106(6):1599–607. doi: 10.3324/haematol.2020.248187 (PMC8168504; doi:10.3324/haematol.2020.248187), 2020-06-04
Supplement: 2020_248187_COOPER_SUPPL.pdf [file 2020_248187_COOPER_SUPPL.pdf]

# Allogeneic hematopoietic cell transplantation with non-myeloablative conditioning for patients with hematologic malignancies: improved outcomes over two decades

Jason P. Cooper,<sup>1,2</sup> Barry E. Storer,<sup>1,2</sup> Noa Granot,<sup>1</sup> Boglarka Gyurkocza,<sup>1,2\*</sup> Mohamed L. Sorrow,<sup>1,2</sup> Thomas R. Chauncey,<sup>1,2,3</sup> Judith Shizuru,<sup>4</sup> Georg-Nikolaus Franke,<sup>5</sup> Michael B. Maris,<sup>6</sup> Michael Boyer,<sup>7</sup> Benedetto Bruno,<sup>8</sup> Firoozeh Sahebi,<sup>9</sup> Amelia A. Langston,<sup>10</sup> Parameswaran Hari,<sup>11</sup> Edward D. Agura,<sup>12</sup> Søren Lykke Petersen,<sup>13</sup> Richard T. Maziarz,<sup>14</sup> Wolfgang Bethge,<sup>15</sup> Julie Asch,<sup>16</sup> Jonathan A. Gutman,<sup>17</sup> Gitte Olesen,<sup>18</sup> Andrew M. Yeager,<sup>19</sup> Kai Hübel,<sup>20</sup> William J. Hogan,<sup>21</sup> David G. Maloney,<sup>1,2</sup> Marco Mielcarek,<sup>1,2</sup> Paul J. Martin,<sup>1,2</sup> Mary E. D. Flowers,<sup>1,2</sup> George E. Georges,<sup>1,2</sup> Ann E. Woolfrey,<sup>1,2</sup> H. Joachim Deeg,<sup>1,2</sup> Bart L. Scott,<sup>1,2</sup> George B. McDonald,<sup>1,2</sup> Rainer Storb<sup>1,2</sup> and Brenda M. Sandmaier<sup>1,2</sup>

<sup>1</sup>Fred Hutchinson Cancer Research Center, Seattle, WA, USA; <sup>2</sup>University of Washington, Seattle, WA, USA; <sup>3</sup>Veterans Affairs Puget Sound Health Care System, Seattle, WA, USA; <sup>4</sup>Stanford University, Palo Alto, CA, USA; <sup>5</sup>University of Leipzig, Leipzig, Germany; <sup>6</sup>Colorado Blood Cancer Institute at HealthONE Presbyterian/St. Luke Medical Center, Denver, CO, USA; <sup>7</sup>University of Utah, Salt Lake City, UT, USA; <sup>8</sup>University of Turin, Turin, Italy; <sup>9</sup>City of Hope/Kaiser Permanente Medical Group, Duarte, CA, USA; <sup>10</sup>Winship Cancer Institute at Emory University, Atlanta, GA, USA; <sup>11</sup>Medical College of Wisconsin, Milwaukee, WI, USA; <sup>12</sup>Baylor University, Dallas, TX, USA; <sup>13</sup>University of Copenhagen Rigshospitalet, Copenhagen, Denmark; <sup>14</sup>Oregon Health and Science University, Portland, OR, USA; <sup>15</sup>University of Tübingen, Tübingen, Germany; <sup>16</sup>LDS Hospital, Salt Lake City, UT, USA; <sup>17</sup>University of Colorado, Denver, CO, USA; <sup>18</sup>Aarhus University, Aarhus, Denmark; <sup>19</sup>University of Arizona Cancer Center, Tucson, AZ, USA; <sup>20</sup>University Hospital of Cologne, Cologne, Germany and <sup>21</sup>Mayo Clinic, Rochester, MN, USA

\*Current address: Memorial Sloan Kettering Cancer Center and Weill Cornell Medical College, New York, NY, USA.

©2021 Ferrata Storti Foundation. This is an open-access paper. doi:10.3324/haematol.2020.248187

Received: January 27, 2020.

Accepted: May 27, 2020.

Pre-published: June 4, 2020.

Correspondence: JASON P. COOPER - [jpcooper@fredhutch.org](mailto:jpcooper@fredhutch.org)

## SUPPLEMENTARY DATA FOR

### **Allogeneic hematopoietic cell transplantation with non-myeloablative conditioning for patients with hematologic malignancies: Improved outcomes over two decades**

**Running title:** Improved outcomes for non-myeloablative allo-HCT

Jason P. Cooper<sup>1,2</sup>, Barry E. Storer<sup>1,2</sup>, Noa Granot<sup>1</sup>, Boglarka Gyurkocza<sup>1,2\*</sup>, Mohamed L. Sorrow<sup>1,2</sup>, Thomas R. Chauncey<sup>1,2,3</sup>, Judith Shizuru<sup>4</sup>, Georg-Nikolaus Franke<sup>5</sup>, Michael B. Maris<sup>6</sup>, Michael Boyer<sup>7</sup>, Benedetto Bruno<sup>8</sup>, Firoozeh Sahebi<sup>9</sup>, Amelia A. Langston<sup>10</sup>, Parameswaran Hari<sup>11</sup>, Edward D. Agura<sup>12</sup>, Søren Lykke Petersen<sup>13</sup>, Richard T. Maziarz<sup>14</sup>, Wolfgang Bethge<sup>15</sup>, Julie Asch<sup>16</sup>, Jonathan A. Gutman<sup>17</sup>, Gitte Olesen<sup>18</sup>, Andrew M. Yeager<sup>19</sup>, Kai Hübel<sup>20</sup>, William J. Hogan<sup>21</sup>, David G. Maloney<sup>1,2</sup>, Marco Mielcarek<sup>1,2</sup>, Paul J. Martin<sup>1,2</sup>, Mary E. D. Flowers<sup>1,2</sup>, George E. Georges<sup>1,2</sup>, Ann E. Woolfrey<sup>1,2</sup>, H. Joachim Deeg<sup>1,2</sup>, Bart L. Scott<sup>1,2</sup>, George B. McDonald<sup>1,2</sup>, Rainer Storb<sup>1,2</sup>, and Brenda M. Sandmaier<sup>1,2</sup>

## SUPPLEMENTAL ITEMS

**Table S1. Transplant conditioning regimen and GVHD prophylaxis protocol numbers and the corresponding ClinicalTrials.gov registry identifiers.**

**Table S2. Comparison of major endpoints in two most recent transplant eras.**

**Table S3. Comparison of incidences of organ complications and infections in two most recent transplant eras.**

**Table S1. Transplant conditioning regimen and GVHD prophylaxis protocol numbers and the corresponding ClinicalTrials.gov registry identifiers.**

| <b>Protocol Number</b> | <b>ClinicalTrials.gov Identifier</b> |
|------------------------|--------------------------------------|
| 1209.00                | NCT00003145                          |
| 1225.00                | NCT00003196                          |
| 1383.00                | NCT00003954                          |
| 1406.00                | NCT00005801                          |
| 1409.00                | NCT00005803                          |
| 1463.00                | NCT00005799                          |
| 1533.00                | NCT00006251                          |
| 1581.00                | NCT00036738                          |
| 1596.00                | NCT00014235                          |
| 1623.00                | NCT00031655                          |
| 1641.00                | NCT00027820                          |
| 1654.00                | NCT00045435                          |
| 1668.00                | NCT00078858                          |
| 1711.00                | NCT00060424                          |
| 1732.00                | NCT00052546                          |
| 1813.00                | NCT00075478                          |
| 1840.00                | NCT00104858                          |
| 1898.00                | NCT00089011                          |
| 1938.00                | NCT00105001                          |
| 1954.00                | NCT00110058                          |
| 2056.00                | NCT00397813                          |
| 2070.00                | NCT00793572                          |
| 2430.00                | NCT01252667                          |
| 2448.00                | NCT01231412                          |
| 2546.00                | NCT01527045                          |

Abbreviations: GVHD, graft-versus-host disease.

**Table S2. Comparison of major endpoints in two most recent transplant eras.**

|                                        | <b>Adjusted<sup>a</sup></b> | <b>P</b> |
|----------------------------------------|-----------------------------|----------|
|                                        | <b>HR (95% CI)</b>          |          |
| Overall survival                       |                             |          |
| 2004 – 2009                            | 1.0                         |          |
| 2010 – 2017                            | 0.83 (0.7 – 1.0)            | .03      |
| Progression-free survival              |                             |          |
| 2004 – 2009                            | 1.0                         |          |
| 2010 – 2017                            | 0.81 (0.7 – 0.9)            | .007     |
| Relapse/progression                    |                             |          |
| 2004 – 2009                            | 1.0                         |          |
| 2010 – 2017                            | 0.76 (0.6 – 0.9)            | .01      |
| Non-relapse mortality                  |                             |          |
| 2004 – 2009                            | 1.0                         |          |
| 2010 – 2017                            | 0.89 (0.7 – 1.1)            | .32      |
| Relapse-related mortality <sup>b</sup> |                             |          |
| 2004 – 2009                            | 1.0                         |          |
| 2010 – 2017                            | 0.94 (0.7 – 1.2)            | .61      |
| Acute GVHD grade 2 – 4                 |                             |          |
| 2004 – 2009                            | 1.0                         |          |
| 2010 – 2017                            | 0.79 (0.7 – 0.9)            | .005     |
| Acute GVHD grade 3 – 4                 |                             |          |
| 2004 – 2009                            | 1.0                         |          |
| 2010 – 2017                            | 0.80 (0.5 – 1.2)            | .26      |
| Chronic GVHD                           |                             |          |
| 2004 – 2009                            | 1.0                         |          |
| 2010 – 2017                            | 0.97 (0.8 – 1.1)            | .72      |

Abbreviations: HR, hazard ratio; CI, confidence interval; GVHD, graft-versus-host disease; MM, multiple myeloma; AML, acute myeloid leukemia; CMV, cytomegalovirus; R, recipient; D, donor; HCT, hematopoietic cell transplantation; HCT-CI, hematopoietic cell transplantation comorbidity index.

<sup>a</sup>Adjusted for transplant center (stratification); treatment type (on-protocol, off-protocol), age ( $\leq 49$ , 50 – 59,  $\geq 60$  years); disease risk group (low, standard, high); MM diagnosis; AML diagnosis; CMV (R– and D–, R+ or D+); donor relation (related, unrelated); sex mismatch (female to male, others); prior HCT (no, yes); allele mismatch (no, yes); HCT-CI (0, 1 – 2, 3,  $\geq 4$ , missing).

<sup>b</sup>Relapse-related mortality refers to survival after relapse among patients that relapsed.

**Table S3. Comparison of incidences of organ complications and infections in two most recent transplant eras.**

| <b>Organ Toxicity</b>        | <b>Adjusted<sup>a</sup></b> |          |
|------------------------------|-----------------------------|----------|
|                              | <b>OR (95% CI)</b>          | <b>P</b> |
| Bilirubin > 4 mg/dL          |                             |          |
| 2004 – 2009                  | 1.0                         |          |
| 2010 – 2017                  | 0.84 (0.5 – 1.2)            | .34      |
| Bilirubin > 10 mg/dL         |                             |          |
| 2004 – 2009                  | 1.0                         |          |
| 2010 – 2017                  | 1.16 (0.5 – 3.0)            | .76      |
| Creatinine > 2x baseline     |                             |          |
| 2004 – 2009                  | 1.0                         |          |
| 2010 – 2017                  | 1.13 (0.9 – 1.5)            | .36      |
| <b>Infections</b>            | <b>HR (95% CI)</b>          | <b>P</b> |
| Gram-negative bacteremia     |                             |          |
| 2004 – 2009                  | 1.0                         |          |
| 2010 – 2017                  | 0.83 (0.7 – 1.0)            | .03      |
| Invasive fungal infection    |                             |          |
| 2004 – 2009                  | 1.0                         |          |
| 2010 – 2017                  | 0.84 (0.7 – 1.0)            | .05      |
| CMV antigenemia <sup>b</sup> |                             |          |
| 2004 – 2009                  | 1.0                         |          |
| 2010 – 2017                  | 0.75 (0.6 – 0.9)            | .004     |
| CMV disease <sup>b</sup>     |                             |          |
| 2004 – 2009                  | 1.0                         |          |
| 2010 – 2017                  | 0.77 (0.6 – 1.0)            | .02      |

Abbreviations: OR, odds ratio; HR, hazard ratio; CI, confidence interval; MM, multiple myeloma; AML, acute myeloid leukemia; R, recipient; D, donor; HCT, hematopoietic cell transplantation; HCT-CI hematopoietic cell transplantation comorbidity index.

<sup>a</sup>Adjusted for transplantation center; treatment type (protocol, treatment plan); age ( $\leq 49$ , 50 – 59,  $\geq 60$  years); disease risk group (low, standard, high); MM diagnosis; AML diagnosis; CMV (R– and D–, R+ or D+); donor relation (related, unrelated); sex mismatch (female to male, others); prior HCT (no, yes); allele mismatch (no, yes); and HCT-CI (0, 1 – 2, 3,  $\geq 4$ , missing).

<sup>b</sup>CMV endpoints evaluated only among seropositive recipients at HCT.
